# Supplementary material
Source: HighWire-hosted journal article supplement (doi:10.1101/rna.045559.114)
Supplement: SuppFigLegends.docx [file SuppFigLegends.docx]

**Figure S1. YB-1 binds specifically to CD44 RNA.** A. RNA EMSA using purified GST-YB-1 protein shows interaction with mRNA from the fourth exon of CD44. Lane I: DIG-labeled probe in the absence of YB-1. Lane II: labeled probed in the presence of YB-1. Lane III: labeled probe, YB-1 and an excess (20x) of unlabeled RNA probes as competitor. B. RNA EMSA with increasing concentrations of biotin labeled probes. Lane I: 1.5μl biotin labeled probe. Lane II: 3μl biotin labeled probe. Lane III: 4.5μl biotin labeled probe. C. RNA EMSA with increasing concentrations of protein. Lane I: 7.5 fmol protein. Lane II: 15 fmol protein. Lane III: 30 fmol protein. All reactions use unlabeled tRNA as a nonspecific competitor.

**Figure S2. Shad1 shyRNA correlation with YB-1.** A. In a normal prostate epithelial cell line (RWPE), Shad1 (-50) is down-regulated similar to that of Shad1. B. Upon lentiviral infection with shRNA for YB-1, Shad1 (-50) levels also decreases. C. Upon overexpression of YB-1, Shad1 (-50) levels are also increased. D. The beta-glucuronidase gene (GusB), not known to be regulated by YB-1, does not change between prostate normal and cancer cell lines. E. GusB expression does not change upon lentiviral infection with shRNA for YB-1. F. GusB expression does not change upon overexpression of YB-1.

**Figure S3. Characterization of Shad1 regulated genes.** A. Upon lentiviral infection with shRNA for YB-1, the genes whose expression was disregulated upon Shad1 knockdown were also down-regulated when examined by qPCR. All genes are significantly differentially expressed with p-values <0.05; n=3. Hashed line represents no relative change; anything above is up-regulated and below is down-regulated. B. Motif analysis of genes disregulated by Shad1 knockdown revealed a common motif among all 13 genes.

**Figure S4. YB-1 co-localizes with Shad1 to cytoplasmic bodies in HeLa cells.**  A. Upon heat shock or oxidative stress (arsenite), Shad1 localizes with YB-1 to P-bodies (GW182). B. Under the same conditions, some of the Shad1 localizes with YB-1 to stress granules (eIF3). * denotes Shad1 signal in the nucleus.

**Figure S5. YB-1 co-localizes with Shad1 to cytoplasmic bodies in HEK293 cells.** A.Upon heat shock or oxidative stress (arsenite), Shad1 localizes with YB-1 to P-bodies (GW182). B.Under the same conditions, some of the Shad1 localizes with YB-1 to stress granules (eIF3).

**Figure S6. YB-1 co-localizes with Shad1 to cytoplasmic bodies in MCF7 cells.** A. Upon heat shock or oxidative stress (arsenite), Shad1 localizes with YB-1 to P-bodies (GW182). B. Under the same conditions, some of the Shad1 localizes with YB-1 to stress granules (eIF3).

**Figure S7. YB-1 co-localizes with Shad1 to cytoplasmic bodies in P19 cells.** A. Upon heat shock or oxidative stress (arsenite), Shad1 localizes with YB-1 to P-bodies (GW182). B. Under the same conditions, some of the Shad1 localizes with YB-1 to stress granules (eIF3).

**Figure S8. YB-1 co-localizes with Shad1 to cytoplasmic bodies in COS7 cells.** A. Upon heat shock or oxidative stress (arsenite), Shad1 localizes with YB-1 to P-bodies (GW182). B. Under the same conditions, some of the Shad1 localizes with YB-1 to stress granules (eIF3).

**Figure S9. A probe against the upstream (-50 nts) region of Shad1 resembles the localization patterns for probes that target the Shad1 small RNA.** A. Upon heat shock or oxidative stress (arsenite), Shad1 localizes with YB-1 to P-bodies (GW182). B. Under the same conditions, some of the Shad1 localizes with YB-1 to stress granules (eIF3).

**Figure S10. Flag-tagged YB-1 co-localizes to cytoplasmic bodies with Shad1.** A. Upon heat shock or oxidative stress (arsenite), Shad1 localizes with YB-1 to P-bodies (GW182). B. Under the same conditions, some of the Shad1 localizes with YB-1 to stress granules (eIF3).

**Figure S11. YB-1 co-localizes with Shad1 in PC-3 cells to P-bodies using Dcp1a as a marker.** Upon heat shock or oxidative stress (arsenite), Shad1 localizes with YB-1 to P-bodies.

**Figure S12. Shad1 levels remain unchanged under arsenite stress.** Northern blot shows cytoplasmic enrichment of Shad1 in both control and arsenite conditions with no marked increase in Shad1 expression levels.
